# Supplementary material for: Carbon Inks-Based Screen-Printed Electrodes for Qualitative Analysis of Amino Acids
Source: MDPI journal article supplement (doi:10.3390/ijms24021129), 2023-01-06
Supplement: s1 [file s1]

# Supplementary information

## Carbon inks based screen-printed electrodes for qualitative analysis of amino acids

Teodor Adrian Enache <sup>1</sup>, Monica Enculescu <sup>1,\*</sup>, Mihaela-Cristina Bunea <sup>1</sup>,  
Estibaliz Armendariz Zubillaga <sup>2</sup>, Edurne Tellechea <sup>2</sup>, Maite Aresti <sup>2</sup>, María Lasheras <sup>2</sup>,  
Aaron C. Asensio <sup>3</sup> and Victor C. Diculescu <sup>1,\*</sup>

<sup>1</sup> Laboratory of Functional Nanostructures, National Institute of Materials Physics, Atomistilor  
405A, 077125, Magurele, Romania

<sup>2</sup> NAITEC, C/ Tajonar 20 -31006, Pamplona, Navarra, Spain

<sup>3</sup> MATEPRINCS, Paseo Zarapuz, 1, 31200, Navarra, Spain

\* Correspondence: mdatcu@infim.ro (M.E.); victor.diculescu@infim.ro (V.C.D.)

Sample electrodes with different PANI:ZnO ratios, **Table S1**, were analyzed before selecting the one presented in the manuscript (2% PANI: 0.4% ZnO).

**Table S1.** mSPE electrodes with different PANI:ZnO proportions.

| sample # | PANI (%) | ZnO (%) |
|----------|----------|---------|
| 1        | 0        | 0.0     |
| 2        | 1        | 0.1     |
| 3        | 1        | 0.2     |
| 4        | 2        | 0.2     |
| 5        | 2        | 0.4     |
| 6        | 10       | 2.0     |

The analysis/screening of their response was performed by cyclic voltammetry in different electrolytes such as 0.1 M H<sub>2</sub>SO<sub>4</sub>, 0.1 M HCl, pH = 7.0 0.1 M phosphate buffer, in the absence and in the presence of 1 mM K<sub>4</sub>[Fe(CN)<sub>6</sub>], **Figure S1**.

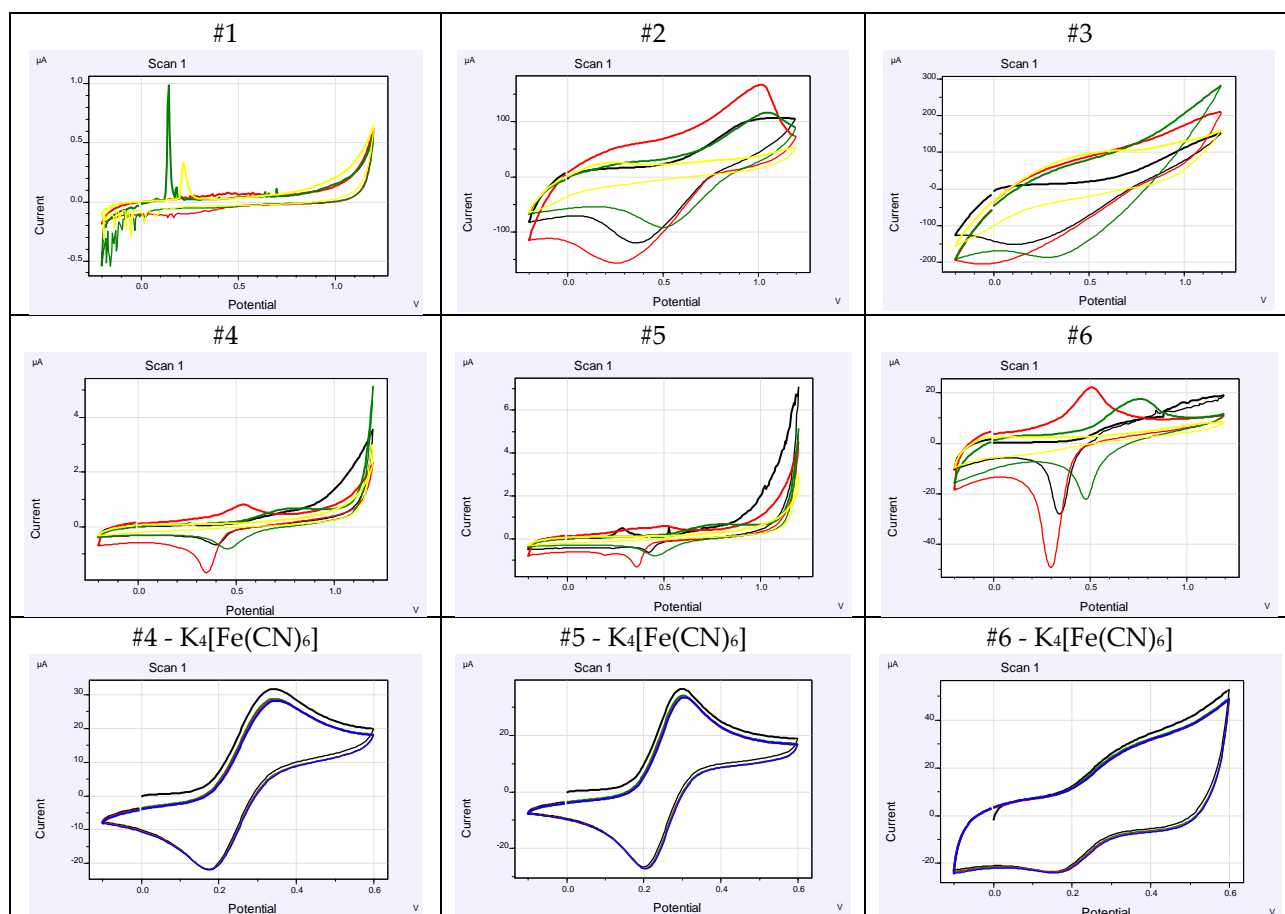

**Figure S1.** Cyclic voltammograms at  $v = 100 \text{ mV s}^{-1}$  of different samples (Table S1) in 0.1 M H<sub>2</sub>SO<sub>4</sub> (red curve- first scan and black curve-the second scan), 0.1 M HCl (green curve) and pH = 7.0 0.1 M phosphate buffer (yellow curve) in the absence and presence of 1 mM K<sub>4</sub>[Fe(CN)<sub>6</sub>].

Of all these samples, the electrode with the 2% PANI : 0.4% ZnO composition has shown the most appropriate electrochemical response and chosen for further investigations.

The electrochemical behavior of SPEs and mSPE (2% PANI : 0.4% ZnO) was investigated in 0.1 M H<sub>2</sub>SO<sub>4</sub> (without any redox probe) in order to assess the intrinsic electroactivity of the electrodes, **Figure S2**.

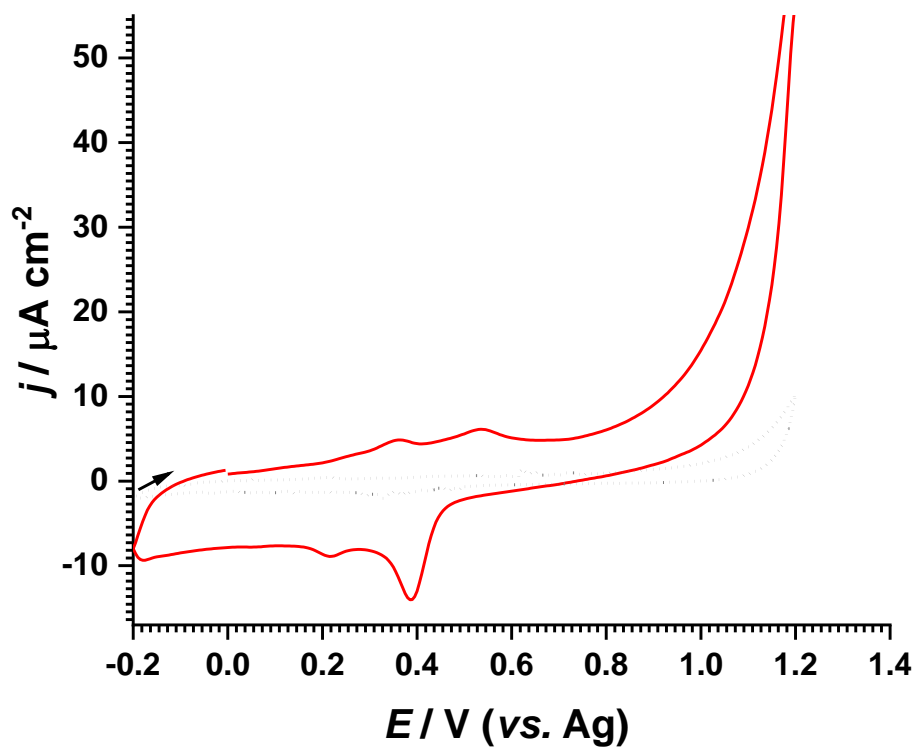

**Figure S2.** Cyclic voltammograms of SPE (dotted curve) and mSPE (red curve) in 0.1 M H<sub>2</sub>SO<sub>4</sub> at  $v = 100 \text{ mV s}^{-1}$ .
